# Supplementary material for: Continuous Glucose Monitoring (CGM) in Sports – a Comparison between a CGM Device and Lab-Based Glucose Analyser under Resting and Exercising Conditions in Athletes
Source: Preprints.org preprint supplement (doi:10.20944/preprints202305.1073.v1), 2023-05-16
Supplement: Supplementary file 4 [file supplementary]

**Supplemental Information**

|  | ∆mean (meanHC-meanLC) | SD | T | df | 95% CIlower | 95%CIupper | Two-sided p-value | Effect size  d |
| --- | --- | --- | --- | --- | --- | --- | --- | --- |
| BLCB | -3.29 | 11.27 | -0.771 | 6 | -13.71 | 7.15 | .470 | .39 |
| BLISF | 8.80 | 8.16 | 2.409 | 4 | -1.34 | 18.94 | .074 | 1.12 |
| AUCCB | -239.17 | 971.95 | -.603 | 5 | -1259.16 | 780.82 | .573 | .28 |
| AUCISF | 1714.00 | 732.07 | 4.683 | 3 | 549.11 | 2878.89 | .018 | 1.62 |

Suppl. 1 Parametric test analysis of R/Fast comparing HC and LC, respectively considering BL and AUC.

|  | MARD ± SD |
| --- | --- |
| HC_R/Fast | 6.56 ± 5.56 |
| LC_R/Fast | 11.39 ± 6.25 |

Suppl. 2 MARD ± SD of HC_R/Fast and LC_R/Fast.

|  |
| --- |
|  |

Suppl. 3 Mean CB and ISF glucose concentrations including SD (solid line and positive error indication reflecting SD = CB; dashed line and negative error indication reflecting SD = ISF).

|  |
| --- |
|  |

Suppl. 4 Systematic measurement difference of CB and ISF glucose concentration by Bland-Altman plot showing mean difference and their 95% confidence interval as lower and upper limit of agreement.

|  | ∆mean (meanHC-meanLC) | SD | T* | df | 95% CIlower | 95%CIupper | Two-sided p-value | Effect size  d* |
| --- | --- | --- | --- | --- | --- | --- | --- | --- |
| BLCB | -.60 | 7.69 | -.247 | 9 | -6.10 | 4.90 | .811 | .04 |
| BLISF | .00 | 8.54 | -.000 | 9 | -6.11 | 6.11 | 1.000 | .00 |
| PEAKCB | 3.00 | 19.20 | .469 | 8 | -11.76 | 17.76 | .652 | .12 |
| PEAKISF | 4.14 | 15.89 | .690 | 6 | -10.55 | 18.84 | .516 | .23 |
| AUCCB | 50.63 | 1042.89 | .137 | 7 | -821.25 | 922.50 | .895 | .05 |
| AUCISF |  |  | -1.461 |  |  |  | .144 | .85 |

Suppl. 5 Parametric and non-parametric test analysis of R/Glc comparing HC and LC, respectively considering BL, PEAK and AUC. *As for AUCISF non-parametric test was performed, z-value instead of t-value and Pearson’s r instead of Cohen’s d are displayed.

| HC_R/Glc | | | | | | | | | | | | | | | | | | | | | | | |
| --- | --- | --- | --- | --- | --- | --- | --- | --- | --- | --- | --- | --- | --- | --- | --- | --- | --- | --- | --- | --- | --- | --- | --- |
|  | BL | | 0 | | 5 | | 10 | | 15 | | 30 | | 45 | | 60 | | 75 | | 90 | | 105 | | 120 |
| CB | 87±5 | | 92±11 | | 113±21 | | 130±20 | | 146±22 | | 177±24 | | 166±22 | | 143±22 | | 114±30 | | 99±27 | | 79±17 | | 74±14 |
| ISF | 78±12 | | 76±13 | | 82±14 | | 94±17 | | 115±23 | | 157±21 | | 158±22 | | 125±25 | | 94±22 | | 80±21 | | 72±13 | | 68±16 |
| LC_R/Glc | | | | | | | | | | | | | | | | | | | | | | | |
|  | BL | | 0 | | 5 | | 10 | | 15 | | 30 | | 45 | | 60 | | 75 | | 90 | | 105 | | 120 |
| CB | 90±16 | | 95±16 | | 107±23 | | 134±18 | | 157±17 | | 179±28 | | 155±25 | | 137±23 | | 116±22 | | 98±20 | | 85±20 | | 74±18 |
| ISF | 82±15 | | 81±9 | | 83±13 | | 96±20 | | 119±22 | | 159±25 | | 141±30 | | 113±24 | | 97±23 | | 83±19 | | 77±19 | | 67±16 |
| 65/Glc | | | | | | | | | | | | | | | | | | | | | | | |
|  | | BL | | 0 | | 10 | | 20 | | 30 | | 40 | | 50 | | 60 | | 70 | | 80 | | 90 | |
| CB | | 90±8 | | 93±9 | | 138±17 | | 169±17 | | 165±26 | | 101±15 | | 88±20 | | 89±16 | | 86±16 | | 88±19 | | 82±19 | |
| ISF | | 80±7 | | 80±6 | | 97±9 | | 135±25 | | 160±26 | | 152±20 | | 114±40 | | 89±15 | | 82±18 | | 85±22 | | 84±21 | |
| 85/Glc | | | | | | | | | | | | | | | | | | | | | | | |
|  | | BL | | 0 | | 10 | | 20 | | 30 | | 40 | | 50 | | 60 | | 70 | | 80 | | 90 | |
| CB | | 90±6 | | 96±9 | | 131±14 | | 166±10 | | 167±23 | | 111±26 | | 90±23 | | 92±20 | | 91±16 | | 95±22 | | 94±19 | |
| ISF | | 85±6 | | 85±5 | | 102±13 | | 137±15 | | 162±19 | | 157±28 | | 106±38 | | 89±18 | | 91±13 | | 98±21 | | 106±26 | |

Suppl. 6 Mean ± SD of CB and ISF glucose concentrations over time course of data sampling.

|  | MARD ± SD [%] |
| --- | --- |
| HC_R/Glc | 16.73 ± 10.49 |
| LC_R/Glc | 16.88 ± 8.71 |
| 65/Glc | 22.32 ± 24.10 |
| 85/Glc | 18.19 ± 16.51 |

Suppl. 7 MARD ± SD of R/Glc, MC_65/Glc and MC_85/Glc.
